# Supplementary material
Source: publisher site journal article supplement (https://www.dovepress.com/get_supplementary_file.php?f=393846.docx)
Supplement: Supplementary file 1 [file get_supplementary_file.php]

**Supporting Information**

**
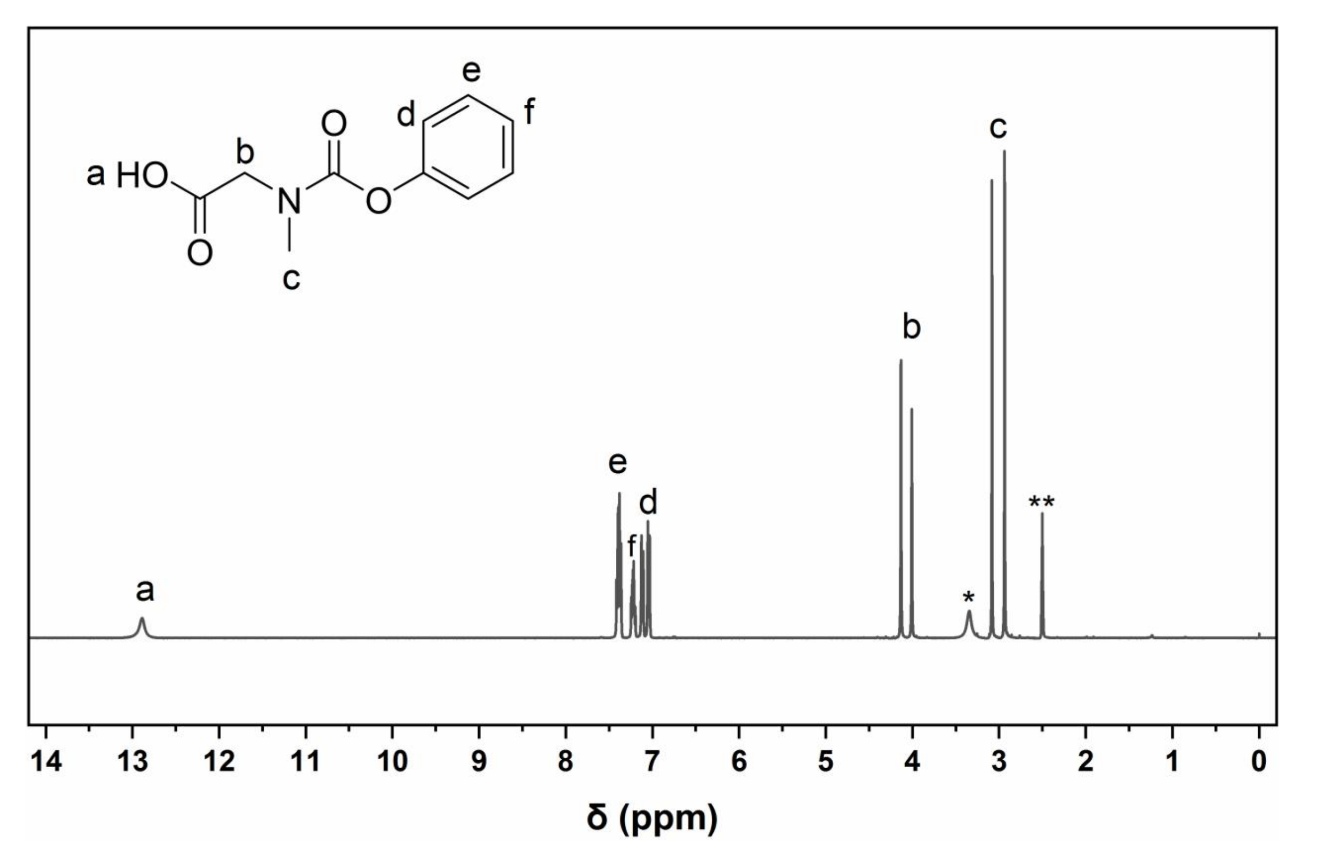
**

Figure S1. 1H NMR spectrum of Sar-NPC in DMSO-d6 (* H2O, ** DMSO).


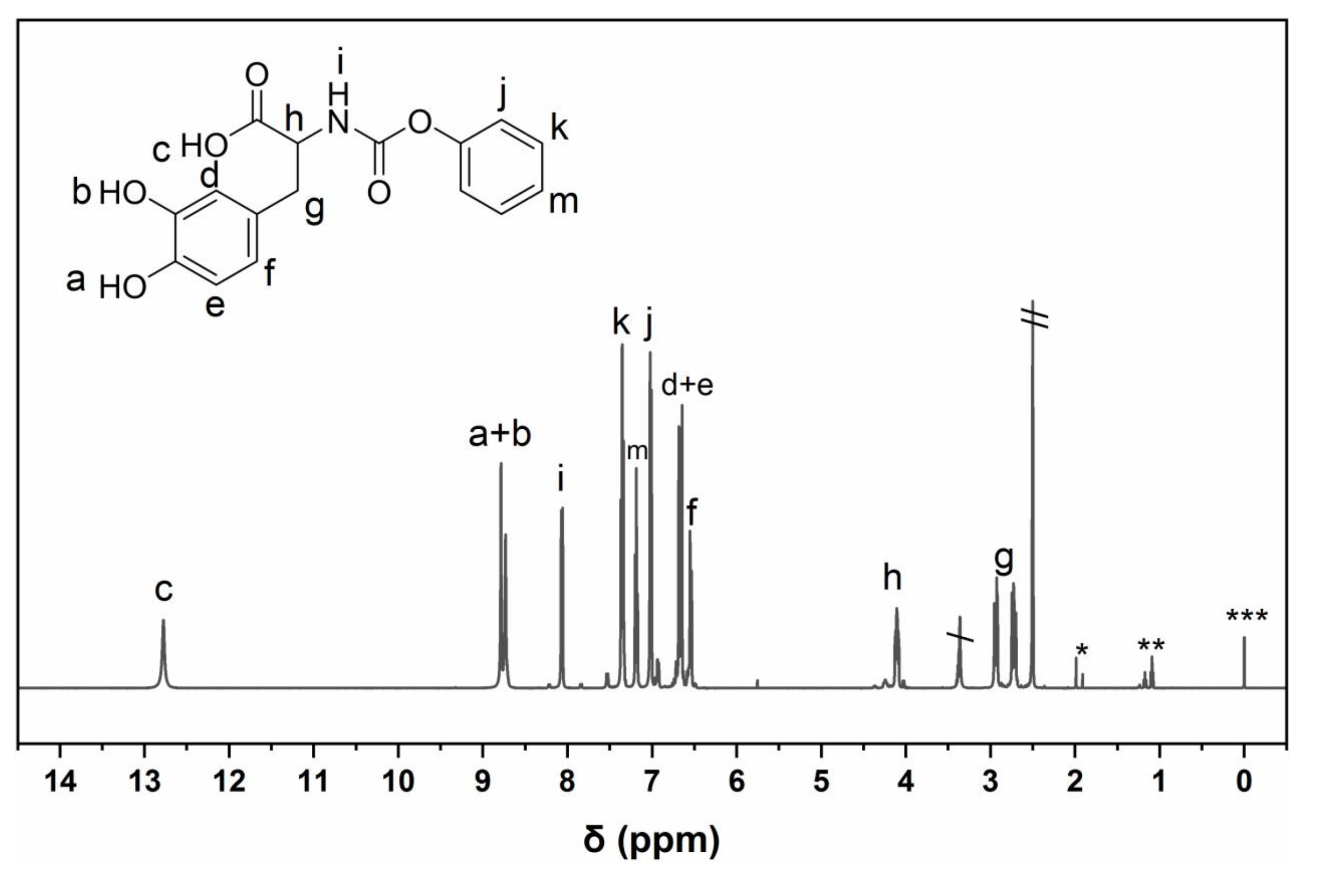


Figure S2. 1H NMR spectrum of L-DOPA-NPC in DMSO-d6 (* ethyl acetate, ** diethyl ether, *** TMS, / water, // DMSO).
